# Supplementary material
Source: Springer Nature journal article supplement (https://www.springermedizin.de/resource/supplementary/12936_2011_1765_MOESM1_ESM.pdf/9541676)

### Amplification

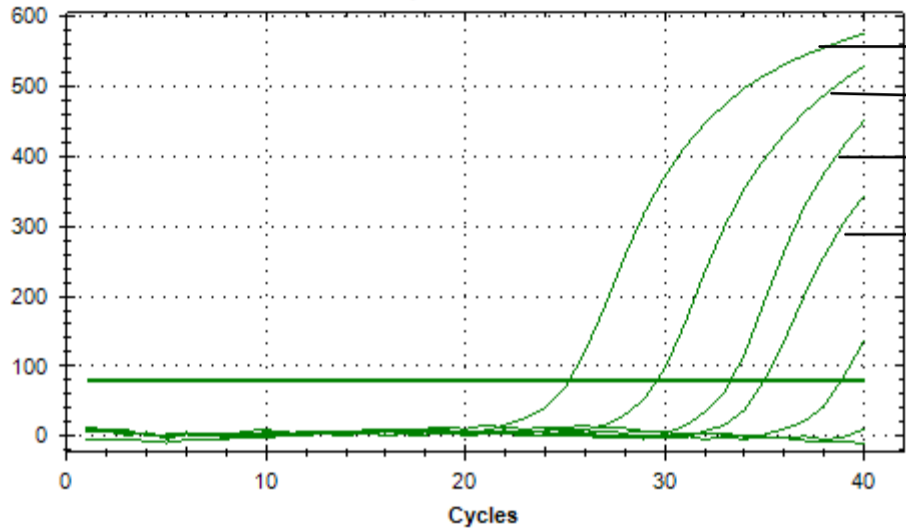

1000 parasites/  $\mu\text{L}$

100 parasites/  $\mu\text{L}$

10 parasites/  $\mu\text{L}$

1 parasite/ $\mu\text{L}$

Supplement: MOESM1 [file 9541676]
